# Supplementary material for: Listeria monocytogenes InlP interacts with afadin and facilitates basement membrane crossing
Source: PLOS journal article supplement (doi:10.1371/journal.ppat.1007094), 2018-05-30
Supplement: S3 (10.1371/journal.ppat.1007094.s003) [file journal.ppat.1007094.s003]

A

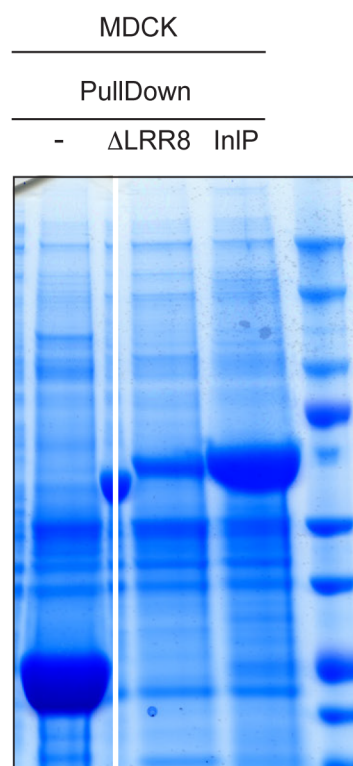

B

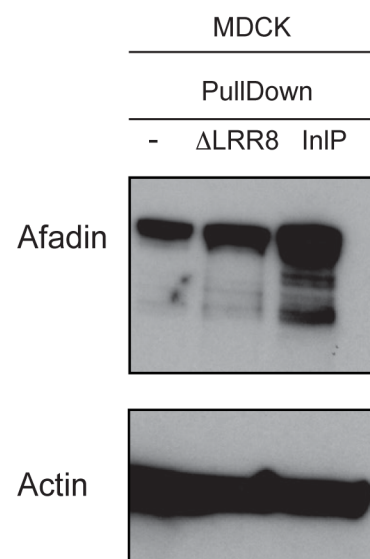

**S3 Figure**
