# Supplementary material for: Listeria monocytogenes InlP interacts with afadin and facilitates basement membrane crossing
Source: PLOS journal article supplement (doi:10.1371/journal.ppat.1007094), 2018-05-30
Supplement: S7 (10.1371/journal.ppat.1007094.s007) [file journal.ppat.1007094.s007]

---

**S2 Table. Yeast two-hybrid screening of human placenta library**

Results summary listing the protein partners identified (gene name), the number of independent clones and the global PBS<sup>a</sup>. Ordering is performed based on global PBS and then on number of clones. Afadin is indicated in red.

---

| Gene name | Number of independent clones | Global PBS <sup>a</sup> |
|-----------|------------------------------|-------------------------|
| RPS8      | 26                           | A                       |
| RBM5      | 14                           | A                       |
| TSHZ1     | 12                           | A                       |
| RPL5      | 9                            | A                       |
| AEBP1     | 7                            | A                       |
| NAB2      | 6                            | A                       |
| THAP3     | 6                            | A                       |
| NAB1      | 4                            | A                       |
| DNMT3A    | 5                            | B                       |
| SAFB      | 5                            | B                       |
| ZNF653    | 5                            | B                       |
| EXOSC3    | 4                            | B                       |
| RPL7A     | 4                            | B                       |
| AF6       | 3                            | B                       |
| FLJ22329  | 3                            | B                       |
| SP3       | 3                            | B                       |
| ZNF653    | 5                            | B                       |
| ZNF6      | 3                            | C                       |
| CDC27     | 2                            | C                       |
| EPS8L2    | 2                            | C                       |
| PHF23     | 2                            | C                       |
| ZNF283    | 2                            | C                       |

---

<sup>a</sup>Global Predicted Biological Score (PBS). Confidence score of each interaction. A: very high confidence interaction; B: high confidence in the interaction; and C: good confidence in the interaction.
